# Supplementary material
Source: MDPI journal article supplement (https://www.mdpi.com/2311-7524/9/11/1215)
Supplement: s1 [file s1 › horticulturae-2684253-supplementary.pdf]

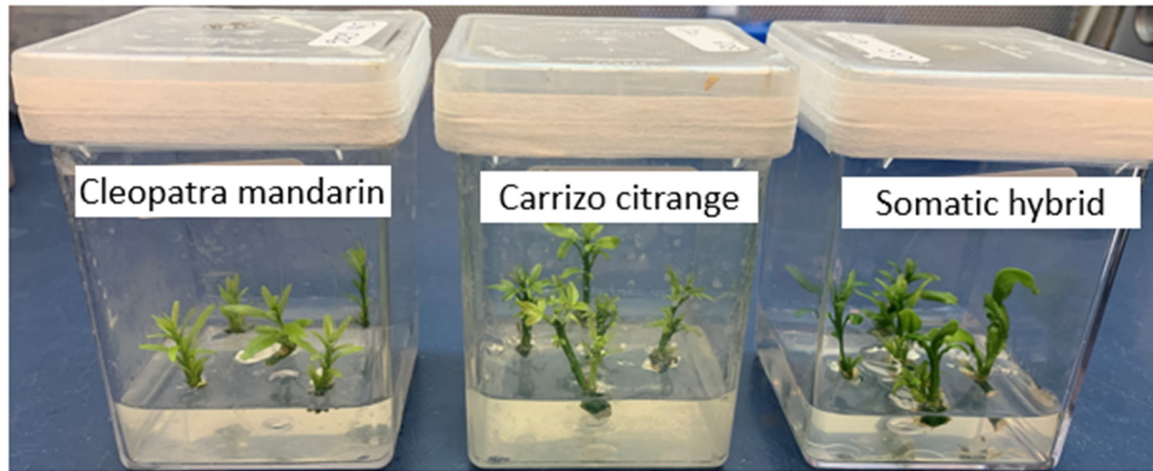

Figure S1. In vitro propagation of Cleopatra mandarin, Carrizo citrange and the tetraploid somatic hybrid in Murashige and Skoog (MS) medium supplemented with 1 mg/L BAP..

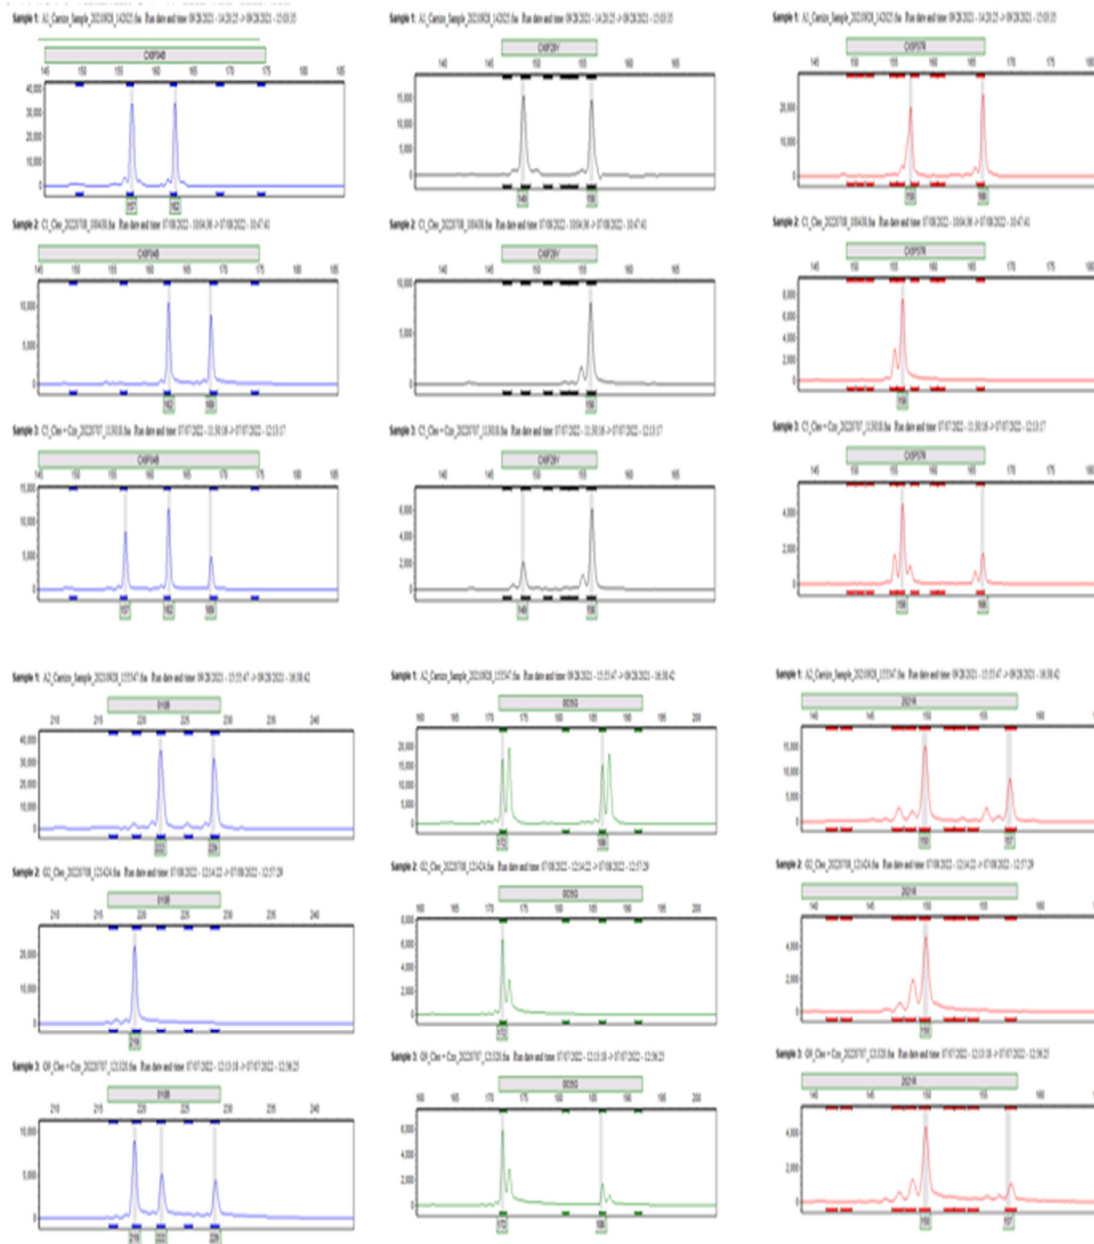

Figure S2. A chromatogram of EST-SSR markers generated from ABI trace files by GeneMarker® software (SoftGenetics).
